# Supplementary material for: A closer look at IRSL SAR fading data and their implication for luminescence dating
Source: Copernicus journal article supplement (doi:10.5194/gchron-2020-3), 2020-02-10
Supplement: Supplementary file 2 [file gchron-2020-3-supplement.zip]

## Supplement 3 – Comparison of gross signals vs. net signals for the interval 1 – 20 s

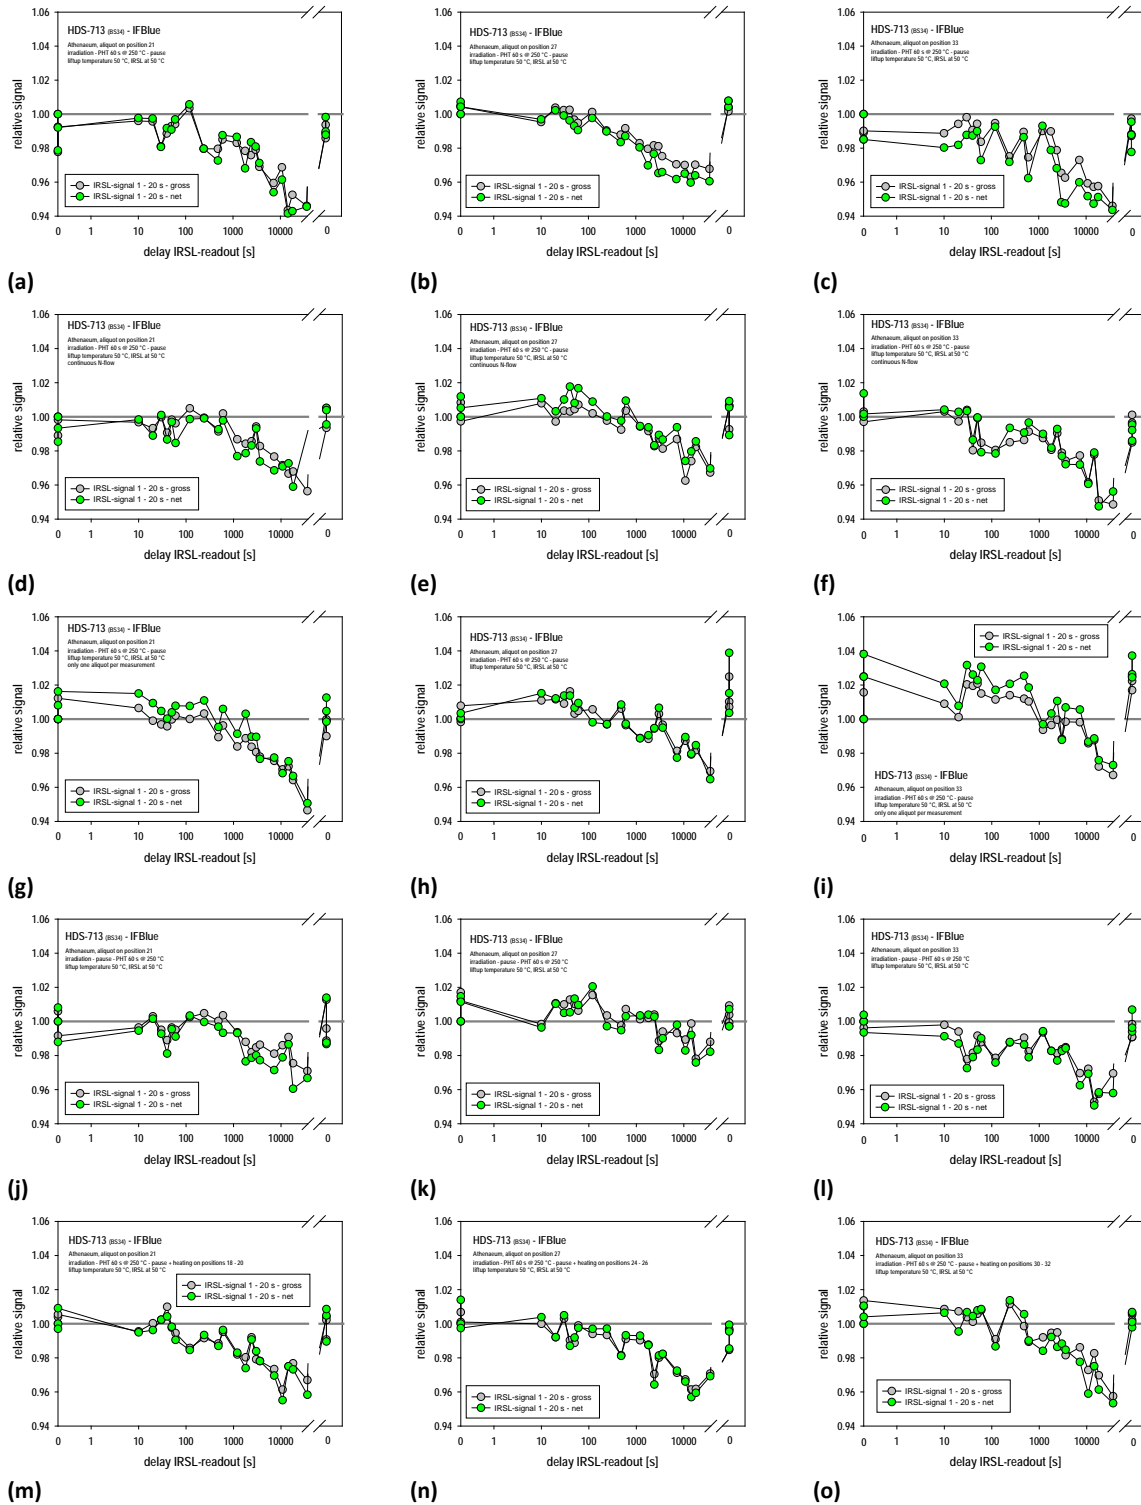

**Fig. ii** Results for HDS-713 on DA20 (Athenaeum) with preheat 60 s at 250 °C, IRSL at 50 °C, liftup temperature 50 °C, laboratory dose 10.3 Gy (100 s beta irradiation time) and normalisation dose 5.2 Gy (50 s beta irradiation time). Gross signals (grey) and net signals (green) for the interval 1 – 20 s.

- **(a – c)** only 120 s nitrogen flow at the beginning ( $T_{fad-13}$ )
- **(d – f)** continuous nitrogen flow ( $T_{fad-14}$ )
- **(g – i)** each aliquot measured separately in three individual runs ( $T_{fad-15}$ )
- **(j – l)** pause before preheat (Rhodius et al. 2015) ( $T_{fad-16}$ )
- **(m – o)** extra heating on neighbouring positions (here: 3 x 180 s at 250 °C) (FT-27)

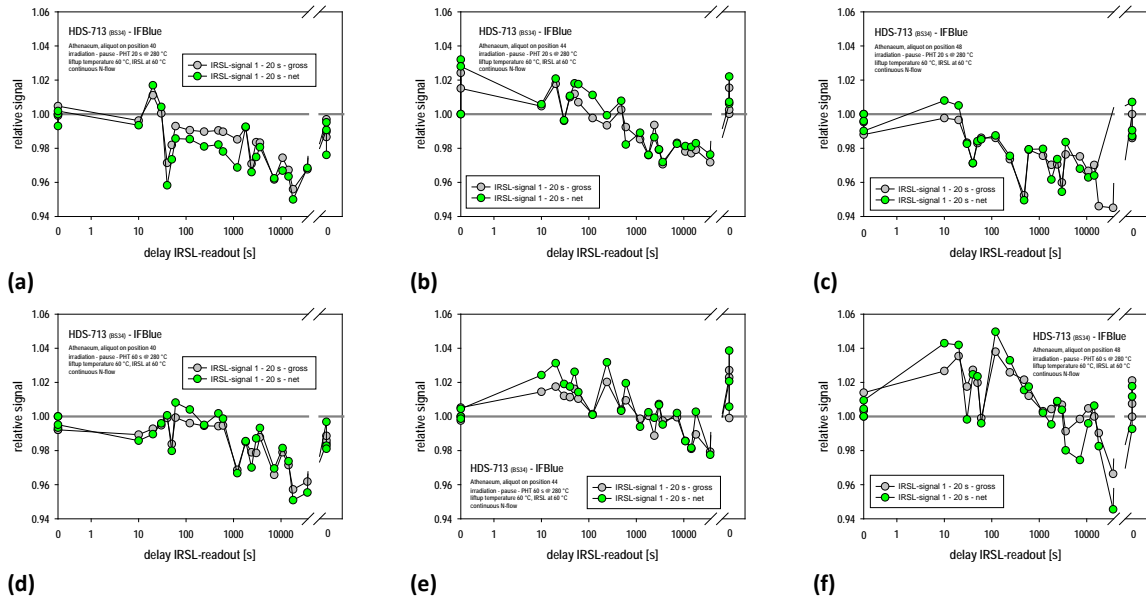

**Fig. iii** Results for HDS-713 on DA20 (Athenaeum) with IRSL readout at 60 °C and liftup temperature of 60 °C. Laboratory dose 10.3 Gy (100 s beta irradiation time) and normalisation dose 5.2 Gy (50 s beta irradiation time). Gross signals (grey) and net signals (green) for the interval 1 – 20 s.

- **(a – c)** Preheat 20 s at 280 °C ( $T_{fad-17}$ ) versus **(d – f)** preheat 60 s at 280 °C ( $T_{fad-18}$ ).
